---

1 Short Title: B1L regulates lateral root development

2 **B1L regulates lateral root development by exocytic vesicular**

3 **trafficking-mediated polar auxin transport in Arabidopsis<sup>1</sup>**

4 **Gang Yang<sup>a,2</sup>, Bi-xia Chen<sup>a,2</sup>, Tao Chen<sup>b</sup>, Jia-hui Chen<sup>a</sup>, Rui Sun<sup>a</sup>,**  
5 **Cong-cong Liu<sup>a</sup>, Jiao Jia<sup>a</sup>, Xiu-le Yue<sup>a</sup>, Li-zhe An<sup>a,c</sup>, Hua Zhang<sup>a,3,4</sup>**

6 <sup>a</sup>Key Laboratory of Cell Activities and Stress Adaptations, Ministry of Education,  
7 School of Life Sciences, Lanzhou University, Lanzhou 730000, China

8 <sup>b</sup>College of Life Science and Technology, Gansu Agricultural University,  
9 Lanzhou 730070, China

10 <sup>c</sup>School of Forestry, Beijing Forestry University, Beijing 100083, China

11 **ORCID IDs: 0000-0002-1637-5662 (G.Y.)**

---

<sup>1</sup> This work was supported by the Key Program National Natural Science Foundation of China (41830321), the National Natural Science Foundation of China (31770432, 32071482) and the Fundamental Research Funds for the Central Universities (lzujbky-2020-31).

<sup>2</sup> These authors contributed equally to the article.

<sup>3</sup> Corresponding author; Xiu-le Yue: [yuexiule@lzu.edu.cn](mailto:yuexiule@lzu.edu.cn), Lizhe An: [lizhean@lzu.edu.cn](mailto:lizhean@lzu.edu.cn) and Hua Zhang: [zhanghua@lzu.edu.cn](mailto:zhanghua@lzu.edu.cn).

<sup>4</sup> Senior author.

The author responsible for distribution of materials integral to the findings presented in this article in accordance with the policy described in the Instructions for Authors ([www.plantphysiol.org](http://www.plantphysiol.org)) is: Hua Zhang ([zhanghua@lzu.edu.cn](mailto:zhanghua@lzu.edu.cn)).

HZ, X-LY and L-ZA conceived the project. B-XC, GY, J-HC, TC, RS, C-CL and JJ performed the experiments. GY analyzed the data and wrote the manuscript. HZ, X-LY and L-ZA examined the data and manuscripts.

## 12 **Abstract**

13 Auxin and auxin-mediated signaling pathways involved in the regulation of  
14 lateral root development are well documented. Although exocytic vesicle  
15 trafficking plays an important role in PIN-auxin-efflux carrier recycling, and  
16 polar auxin transport during lateral root formation, however, the mechanistic  
17 details of these processes are not well understood. Here, we demonstrate an  
18 essential regulatory mechanism of B1L that interacts with the exocyst to  
19 regulate PIN-mediated polar auxin transport and lateral root initiation. B1L is  
20 highly expressed in Arabidopsis roots, and genetic and cellular analyses have  
21 revealed that B1L is mainly involved in lateral root primordia initiation.  
22 Furthermore, *DR5::GUS* expression analyses revealed that auxin levels were  
23 higher in lateral root primordia of the *b1l* mutant than in the wild-type.  
24 Exogenous auxin treatment confirmed that the lateral root phenotype  
25 correlated closely with auxin levels. Additionally, auxin transport-inhibitory  
26 treatment indicated that B1L regulates auxin efflux. Consistently, *b1l* mutants  
27 exhibited higher levels of auxin efflux carriers PIN1-GFP and PIN3-GFP in  
28 lateral root primordia. Moreover, B1L interacts with the exocyst and functions in  
29 recycling PIN2-GFP. Finally, the *b1l-1/exo70b1-1* double-mutant exhibited a  
30 significant increase in the number of lateral roots compared to the wildtype,  
31 *b1l-1*, and *exo70b1-1*. Collectively, this study improves our understanding of  
32 the highly sophisticated processes involved in exocytic vesicular  
33 trafficking-mediated polar auxin transport and lateral root initiation in plants.

34

35 **KEYWORDS:** B1L, Lateral Root, Polar Auxin Transport, Exocytic Vesicular  
36 Trafficking, PIN Recycling

## 37 **Introduction**

38 Roots are important vegetative organs that make plants sessile in soil and  
39 function in water and nutrient absorption (Bellini et al., 2014; Motte et al., 2019).  
40 Lateral root formation is a crucial event in root system morphogenesis (Lynch,  
41 1995). This process is divided into five main steps: pre-branch site priming,  
42 lateral root initiation, lateral root patterning, lateral root emergence, and lateral  
43 root elongation (Péret et al., 2009; Banda et al., 2019). In turn, the phase  
44 between lateral root initiation and its patterning includes steps of the onset and  
45 formation of lateral root primordia. Generally, this phase is divided into eight  
46 stages (I-VIII) according to the layer number of lateral root primordial  
47 cells (Vilches-Barro and Maizel, 2015; Stoeckle et al., 2018). Auxin and  
48 auxin-mediated signaling pathways play a central role in regulating all the  
49 steps of lateral root formation (Lavenus et al., 2013). Specifically, a local auxin  
50 threshold maintained by auxin influx carrier AUX1 (AUXIN RESISTANT1) and  
51 auxin efflux carriers PIN (PIN-FORMED) is essential for lateral root priming  
52 and initiation (Benková et al., 2003; Lavenus et al., 2013).

53 Furthermore, vesicle trafficking, which includes endocytosis and exocytosis,

54 is an important physiological process widely involved in cell polarity  
55 establishment, cell expansion and division, cell wall formation, hormone  
56 signaling, and defense against pathogens(Tanaka et al., 2006; Robatzek, 2007;  
57 Wu et al., 2014; Zhang et al., 2019). Exocytic vesicle trafficking mainly includes  
58 targeting, tethering, and fusion(Uemura and Ueda, 2014; Zhang et al., 2019).  
59 An exocyst is a vital tethering factor that guarantees the specificity of contact  
60 between exocytic vesicles and the plasma membrane (Žárský et al., 2013; Wu  
61 and Guo, 2015; Mei and Guo, 2018). To date, eight subunits (SEC3, SEC5,  
62 SEC6, SEC8, SEC10, SEC15, EXO70, and EXO84) have been found in  
63 Arabidopsis.(Elias et al., 2003; Eckardt, 2008; Fendrych et al., 2010).  
64 Recycling of PIN1 and PIN2 is delayed in *exo70a1*, *sec8*, and *sec6*  
65 mutants(Drdová et al., 2013; Tan et al., 2016). These findings demonstrate that  
66 the exocyst plays an important role in PINs recycling and polar auxin transport.  
67 However, little is known about the precise mechanisms underlying these  
68 processes.

69 BYPASS1-LIKE (B1L) belongs to the DUF793 family whose functions are  
70 largely unknown. Our recent studies revealed that B1L interacts with 14-3-3 $\lambda$  to  
71 inhibit the degradation of CBF3 (C-REPEAT BINDING FACTOR3) and  
72 positively regulates freezing tolerance in Arabidopsis.(Chen et al., 2019). In  
73 addition, B1L interacts with TRANSTHYRETIN-LIKE (TTL) to regulate growth  
74 and freezing tolerance (Chen et al., 2020). However, to the best of our  
75 knowledge, no study has been yet reported on the other molecular functions of  
76 B1L.

77 Here, we report a novel role of B1L revealed by using multiple approaches  
78 including, genetics, cellular biology, proteomics, and biochemical assays,  
79 namely, its involvement in lateral root development. In *b1l* mutants, the number  
80 of lateral roots increased significantly, and the phenotypes were mainly  
81 attributed to lateral root primordium initiation but not to the defects in lateral  
82 root primordium development. Furthermore, auxin levels in the lateral root  
83 primordium of the *b1l* mutant were higher than those observed in the wildtype  
84 (WT), based on detection of DR5::GUS expression. Moreover, exogenous  
85 auxin and auxin transport inhibitory treatments indicated that the phenotype of  
86 lateral roots in *b1l* mutants can be attributed to higher auxin levels and that  
87 B1L regulates auxin efflux. Consistently, auxin efflux carriers PIN1-GFP and  
88 PIN3-GFP were expressed at higher levels in the lateral root primordium of the  
89 *b1l* mutants. Interestingly, B1L interacted with the exocyst and was involved in  
90 exocytic vesicle trafficking. In addition, treatment with BFA revealed defective  
91 PIN2 exocytosis in the *b1l* mutant. Finally, the number of lateral roots  
92 increased significantly in the *b1l-1/exo70b1-1* double mutant in comparison to  
93 that in the WT, *b1l-1*, and *exo70b1-1*. In summary, B1L was revealed to be  
94 involved in exocytic vesicle trafficking-mediated PIN recycling through  
95 interaction with the exocyst and to regulate polar auxin transport to promote  
96 lateral root initiation.

97

## 98 Results

### 99 B1L is highly expressed in Arabidopsis roots

100 To gain further insight into the molecular function of B1L, we first examined its  
101 expression profile in roots, leaves, and whole seedlings. Western blot analysis  
102 revealed that the expression levels of B1L-3xFlag were significantly higher in  
103 roots than in leaves or whole seedlings (Fig. 1, A and B). Next, we constructed  
104 a *B1L::GUS* transgenic plant to further investigate the expression pattern of  
105 B1L. GUS staining revealed that *B1L* was expressed extensively in various  
106 tissues; thus, particularly high levels of expression were observed in the  
107 vascular cylinder, in the meristematic zone of the primary root tissue, and at  
108 eight different developmental stages of lateral root primordia (Fig. 1, C-M).  
109 These results indicate that B1L may be involved in root development.

### 110 B1L regulates lateral root initiation

111 To examine whether B1L is involved in root development, WT, *b1l-1*, *b1l-2*, and  
112 *b1l-4* were grown on  $\frac{1}{2} \times$  MS medium plates under normal conditions and their  
113 phenotypes were monitored. We observed no significant difference in the  
114 length of primary roots among WT, *b1l-1*, *b1l-2*, and *b1l-4* (Supplemental Fig.  
115 S2). However, the number of lateral roots in *b1l-1*, *b1l-2*, and *b1l-4* was  
116 significantly higher than that in the WT (Fig. 2, A and B). Moreover, two  
117 independent transgenic lines expressing B1L-3xFlag driven by the native *B1L*  
118 promoter in *b1l-1* (*B1L::B1L-3xFlag/b1l*) exhibited the same number of lateral  
119 roots as the WT (Fig. 2, A and B), which indicated that the increase in the  
120 number of lateral roots in mutants was caused by the absence of B1L. In  
121 addition, two independent transgenic lines overexpressing *B1L* driven by the  
122 35S promoter in the WT (*B1L-OX#1* and *B1L-OX#2*) exhibited significantly  
123 fewer lateral roots than the WT (Fig. 2, A and B). These results demonstrated  
124 that B1L regulates lateral root formation.

125 In order to reveal the mechanism underlying B1L-mediated regulation of  
126 lateral root development, we examined the differences in the eight  
127 developmental stages of lateral root primordia in the WT, *b1l-2*, and *b1l-4*. No  
128 growth defects were observed at any stage of lateral root primordia  
129 development in *b1l-2* and *b1l-4* (Supplemental Fig. S3). However, our data  
130 suggested that the number of lateral root primordia at stage I and stage II in  
131 *b1l-2* and *b1l-4* were significantly higher than the corresponding number in the  
132 WT (Fig. 2, C-E), and the density of lateral root primordia in *b1l-2* and *b1l-4*  
133 was clearly greater than that in the WT (Fig. 2F). These results indicated that  
134 B1L was involved in the initiation of lateral root primordia.

### 135 B1L is involved in polar auxin transport and affects PIN-mediated auxin 136 efflux

137 Lateral root primordia initiation is well known to depend on local high auxin  
138 levels; furthermore, auxin is known to play a crucial role in all stages of lateral  
139 root development (Vilches-Barro and Maizel, 2015; Stoeckle et al., 2018);  
140 therefore, we investigated whether B1L affects auxin levels during lateral root

141 development. The auxin response reporter *DR5::GUS* was expressed in a  
142 similar pattern in WT and *b1l-1*. GUS staining revealed that the levels of  
143 *DR5::GUS* expression were higher in the lateral root primordia of *b1l-1* than in  
144 that of the WT at all eight stages, especially at stage I (Fig. 3). This indicated  
145 that the auxin levels in *b1l-1* were higher than those in the WT during lateral  
146 root formation. Moreover, IAA treatment at 0.05 and 0.1  $\mu\text{M}$  significantly  
147 increased the number of lateral roots in WT and *b1l-1* plants (Fig. 4, A and B).  
148 Interestingly, the significant difference in the lateral root phenotypes was  
149 eliminated between the WT and *b1l-1* treated with 0.05 and 0.1  $\mu\text{M}$  IAA (Fig. 4,  
150 A and B). This finding indicates that the lateral root phenotypes of the WT and  
151 *b1l-1* can be attributed to auxin levels.

152 As the level of auxin in plants is mainly determined by its biosynthesis and  
153 transport (Du and Scheres, 2018) , first, we investigated whether B1L is  
154 involved in auxin biosynthesis. Treatment with auxin biosynthesis inhibitor  
155 2,3,5-triiodobenzoic acid (TIBA) at concentrations of 0.5 and 1  $\mu\text{M}$  significantly  
156 inhibited the number of lateral roots in both the WT and *b1l-1* plants, however,  
157 there were differences in lateral root phenotype (Supplemental Fig. S4, A and  
158 B). Furthermore, auxin biosynthesis genes were not upregulated in the *b1l-1*  
159 mutant at the transcriptional level (Supplemental Fig. S5A). Therefore, we  
160 concluded that B1L is not involved in auxin biosynthesis.

161 Second, to assess whether B1L affects auxin transport, auxin influx  
162 inhibitor 2-naphthoxyacetic acid (2-NOA) and auxin efflux inhibitor  
163 N-naphthylphthalamic acid (NPA) were used. Both inhibitors reduced the  
164 number of lateral roots in both WT and *b1l-1* plants, significantly  
165 (Supplemental Fig. S4, C and D; Fig. 4, C and D). Moreover, the lateral root  
166 number differed between 2-NOA-treated WT and *b1l-1* plants; however, this  
167 difference was eliminated upon treatment with NPA. This result indicated that  
168 B1L affects the auxin efflux. To further determine the impact of B1L on auxin  
169 efflux, we introduced *AUX1::AUX1-YFP*, *PIN1::PIN1-GFP*, and  
170 *PIN3::PIN3-GFP* into *b1l-1* to observe the expression patterns of the influx  
171 carrier AUX1 and efflux carrier PIN family in the roots of WT and *b1l-1* plants.  
172 As expected, we observed that the levels of PIN1-GFP increased in *b1l-1*  
173 lateral root primordia at all eight stages (Fig. 5A), and the levels of PIN3-GFP  
174 increased in the lateral root primordia of *b1l-1* from stage I to stage III (Fig. 5B).  
175 In addition, no pronounced changes were observed in AUX1-YFP levels  
176 between WT and *b1l-1* (Supplemental Fig. S6). Furthermore, at the  
177 transcriptional level, PINs did not increase in the *b1l-1* mutant (Supplemental  
178 Fig. S5B). Taken together, these findings suggest that B1L regulates polar  
179 auxin transport by its involvement in PIN-mediated auxin efflux.

### 180 **B1L interacts with the exocyst complex**

181 To explore the mechanism whereby, B1L affects PIN levels, we identified  
182 potential proteins that interact with B1L using co-immunoprecipitation (co-IP)  
183 and liquid chromatography-tandem mass spectrometry (LC-MS/MS). Anti-Flag  
184 antibodies conjugated to agarose beads were used to immunoprecipitate

185 B1L-3×Flag and its interacting proteins from root proteins of *B1L::B1L-3×Flag*  
186 and WT, which grew 7 d on ½ × MS medium plates. Five bands, with the  
187 exception of heavy and light chains, were observed by SDS-PAGE  
188 (Supplemental Fig. S7A) and then analyzed by LC-MS/MS. Among these, 888  
189 proteins that were larger than or equal to the two unique peptides, were  
190 identified. Next, GO enrichment analysis revealed that these proteins were  
191 highly enriched in cellular processes (43.89%), metabolic processes (33.95%),  
192 biological regulation (8.27%), localization (7.21%), and response to stimulus  
193 (5.45%) (Supplemental Fig. S7B). Interestingly, 37 vesicle-mediated transport  
194 proteins and 11 exocyst subunits were observed in the cellular process  
195 (Supplemental Fig. S7C and Fig. 6A). In addition, EXO70B1 was previously  
196 identified in our yeast two-hybrid (Y2H) screening assay using B1L-pGBKT7  
197 as bait. These results indicated that B1L interacts with the exocyst complex.

198 To confirm the potential interaction between B1L and the exocyst, we first  
199 examined the physical interactions of B1L with the exocyst subunits using the  
200 Y2H assay. We found that B1L interacted with SEC5A, SEC6, EXO70B1,  
201 EXO70C1, EXO70E1, EXO70F1, and EXO84B in yeast (Fig. 6B).  
202 Subsequently, we performed a bimolecular fluorescence complementation  
203 (BiFC) assay. Transient co-expression of the fusion genes *YFP<sup>N</sup>-B1L* and  
204 *YFP<sup>C</sup>-EXO70B1* in *N. benthamiana* leaves resulted in YFP fluorescence (Fig.  
205 6C). Interestingly, YFP fluorescence was localized not only in the plasma  
206 membrane, but in vesicle-like structures as well (Fig. 6C).  
207 Co-immunoprecipitation (Co-IP) was used to confirm this interaction.  
208 Constructs *35S::B1L-Flag* and *35S::EXO70B1-Myc* were transiently  
209 co-expressed in *N. benthamiana* leaves. Total leaf protein extracts were  
210 immunoprecipitated with anti-Flag agarose beads, and the precipitated  
211 proteins were detected using anti-Myc antibodies. As expected, a band of the  
212 size of EXO70B1-Myc was detected in the anti-Flag agarose precipitated  
213 fractions (Fig. 6D). These results strongly indicated a direct interaction  
214 between B1L and the exocyst *in vivo*.

### 215 **B1L is involved in the exocytic vesicle trafficking of PINs**

216 The plant exocyst complex facilitates tethering between transport vesicles and  
217 the plasma membrane, and plays an important role in auxin efflux carrier PINs  
218 recycling and polar auxin transport (Drdová et al., 2013; Žárský et al., 2013;  
219 Tan et al., 2016). Thus, we hypothesized that B1L is involved in exocytic  
220 vesicle trafficking. To test this hypothesis, we introduced the endoplasmic  
221 reticulum (ER) marker *SEC12::SEC12-YFP* and Golgi marker *SYP32::*  
222 *SYP32-YFP* into *b1l-1*. We found that the locations of SEC12-YFP and  
223 SYP32-YFP were changed and SEC12-YFP and SYP32-YFP formed dot  
224 structures in the primary root of the *b1l-1* mutant (Fig. 7, A-D). These results  
225 indicated that B1L is involved in exocytic vesicle trafficking.

226 We then continued to investigate whether the accumulation of PINs in  
227 *b1l-1* was due to a defect in recycling and trafficking. To this purpose, we  
228 examined PIN2-GFP trafficking in the WT and *b1l-1* roots by treating them with



229 Brefeldin A (BFA) and cycloheximide (CHX). BFA is a reversible vesicle  
230 trafficking inhibitor that causes the aggregation of PIN2 and formation of BFA  
231 bodies (Mayers et al., 2017). CHX is an inhibitor of eukaryotic translation that  
232 can eliminate the differences in PIN2 synthesis (Schneider-Poetsch et al.,  
233 2010). BFA bodies accumulated both in the WT and *b1l-1* mutant of root  
234 epidermal cells treated with BFA+CHX after 60 min, and the number of BFA  
235 bodies increased significantly in the WT, compared to the *b1l-1* mutant (Fig. 7,  
236 E and F). The number of BFA bodies in the WT markedly decreased compared  
237 to that in *b1l-1* after BFA washout at 60 and 90 min. These findings confirmed  
238 our hypothesis that *b1l-1* exhibits defects in PIN2 exocytosis. Thus, we  
239 demonstrated that B1L functions in exocytic vesicle trafficking of PINs.

240 **B1L interacts with EXO70B1 at the gene level to regulate lateral root**  
241 **formation**

242 We investigated the genetic interactions between *B1L* and *EXO70B1*. The  
243 *b1l-1/exo70b1-1* double mutant was generated by crossing *b1l-1* and *exo70b1*.  
244 The lateral root phenotype of *exo70b1* was similar to that of *b1l-1*, which  
245 exhibited a greater number of lateral roots than the WT (Fig. 8). Interestingly,  
246 the lateral root phenotype of *b1l-1* and *exo70b1* significantly increased in the  
247 *b1l-1/exo70b1-1* double mutant (Fig. 8). These results suggested that B1L  
248 regulates lateral root formation by interacting with EXO70B1 at the gene level.

249

## 250 Discussion

251 Our previous studies showed that B1L is involved in the regulation of freezing  
252 tolerance in plants (Chen et al., 2019; Chen et al., 2020); however, other  
253 biological functions of B1L remain unclear. In this study, we revealed a novel  
254 biological function and the elegant underlying molecular mechanism of  
255 B1L-mediated regulation of lateral root formation. The expression pattern of  
256 B1L plays an important role in the development of primary and lateral roots  
257 (Fig. 1). Genetic and cellular analyses showed that B1L regulates lateral root  
258 development and lateral root primordia initiation (Fig. 2 and Supplemental Fig.  
259 S3). In fact, the presence of more lateral roots is not always advantageous for  
260 plants. Lateral roots develop only at specific tissue positions and time points to  
261 accomplish root development for water and nutrient uptake, because every  
262 increase in the number of organs requires additional energy (Péret et al., 2009;  
263 Möller et al., 2017). Therefore, we consider that the larger number of lateral  
264 roots due to the absence of B1L is not necessarily beneficial to healthy plant  
265 development and growth.

266 Lateral root primordia initiation occurs in xylem pole pericycle cells located  
267 in the basal meristem or root elongation zone (Péret et al., 2009; Motte et al.,  
268 2019). The pericycle cells are stimulated by a local auxin threshold level and  
269 become lateral root-founder cells that subsequently undergo anticlinal and  
270 asymmetric divisions to generate a single-layer primordium referred to as  
271 stage I (Péret et al., 2009; Lavenus et al., 2013; Vilches-Barro and Maizel, 2015;  
272 Motte et al., 2019). Therefore, auxin is widely believed to play a crucial role in  
273 regulating lateral root primordia initiation (Lavenus et al., 2013; Bellini et al.,  
274 2014; Du and Scheres, 2018). In the present study, higher auxin levels were  
275 found in the lateral root primordia of the *b1l* mutant (Fig. 3), and exogenous  
276 auxin treatment confirmed that lateral root phenotype correlated closely with  
277 auxin level (Fig. 4, A and B). The local auxin threshold is maintained by auxin  
278 influx and efflux carrier-mediated (i.e., AUX1 and PINs) transport. Our data  
279 showed that the differences in lateral root phenotype between WT and mutant  
280 roots were eliminated upon treatment with the auxin efflux inhibitor NPA (Fig. 4,  
281 C and D). Furthermore, the *b1l* mutant exhibited higher levels of PINs (Fig. 5).  
282 This finding indicated that B1L regulates auxin efflux mainly by influencing the  
283 level of PINs.

284 Co-IP/LC-MS/MS analysis is a powerful tool to unravel the potential roles  
285 of B1L in regulating the level of PINs. We identified 12 exocyst complex  
286 subunits that potentially interact with B1L (Fig. 6A and Supplemental Fig. S7).  
287 These interactions were confirmed by performing Y2H, BiFC, and Co-IP  
288 assays (Fig. 6, B-D). Our findings indicated that B1L interacts with the  
289 tethering exocyst complex composed of eight subunits (SEC3, SEC5, SEC6,  
290 SEC8, SEC10, SEC15, EXO70, and EXO84), which facilitates vesicle contact  
291 with the target membrane (Žárský et al., 2013; Wu and Guo, 2015; Mei and  
292 Guo, 2018). Exocyst mutants *exo70a1* and *sec8* showed defects in the



293 recycling of PIN1 and PIN2 proteins(Drdová et al., 2013). In addition, a recent  
294 study revealed that the *sec6* mutant exhibited the same phenotype as *exo70a1*  
295 and *sec8* mutants in PIN1 and PIN2 protein recycling (Tan et al., 2016). Thus,  
296 the exocyst is widely considered to be involved in regulating PINs and  
297 recycling other plasma membrane proteins (Gao et al., 2008; Naramoto, 2017;  
298 Zhou and Luo, 2018). PIN2 is located in epidermal cells in roots and is  
299 extensively used in BFA treatment assays to investigate vesicle trafficking  
300 (Pavel Křeček et al., 2009; Mayers et al., 2017; Zhou and Luo, 2018). In this  
301 study, the *b1l* mutant exhibited a defect in PIN2-GFP recycling (Fig. 7, E and F),  
302 which indicated that B1L functions in exocytic vesicle trafficking of PINs  
303 through interaction with the exocyst. Regrettably, we failed to observe the  
304 recycling of PIN1-GFP and PIN3-GFP in the WT and *b1l* roots in this study.  
305 Although we investigated PIN2-GFP recycling, instead of PIN1-GFP and  
306 PIN3-GFP, this did not affect our conclusions.

## 307 **Conclusions**

308 In summary, we demonstrated that B1L is involved in regulating auxin  
309 levels by interacting with the exocyst to function in the exocytic vesicle  
310 trafficking-mediated PIN recycling in wildtype root cells. The absence of B1L in  
311 *b1l* mutants seemingly results in abnormal PIN recycling that leads to a higher  
312 local auxin level, which in turn facilitates the initiation of lateral root primordia.  
313 This study improves our understanding of the highly sophisticated processes  
314 involved in exocytic vesicular trafficking-mediated polar auxin transport and  
315 lateral root initiation in plants.

## 316 **Materials and Methods**

### 317 **Plant materials and growth conditions**

318 Wild-type (WT), mutants and transgenic plants used in this study are all Col-0  
319 background of *Arabidopsis thaliana*. The T-DNA insertion mutants *b1l-1*  
320 (SALK\_020993) and *b1l-2* (SALK\_019913) were obtained from the  
321 Arabidopsis Biological Resource Center. The T-DNA insert information are  
322 showed in Fig. S1a. *b1l-4* mutant is the transgene-free gene editing mutant  
323 obtained by using the CRISPR/Cas9 system. *b1l-4* absents 96bp from 13bp to  
324 108bp after initiator codon ATG. The CRISPR/Cas9 system vectors were  
325 kindly provided by the Qi-Jun Chen laboratory of China Agricultural University,  
326 and the protocols performed as previously described(Wang et al., 2015). The  
327 primer sequences that were used for CRISPR/Cas9 system are listed in  
328 Supplemental Table S1. The primer sequences that were used for identification  
329 of *b1l-1*, *b1l-2* and *b1l-4* are listed in Supplemental Table S2 and the results  
330 are showed in Supplemental Fig.S1. Transgenic Arabidopsis plants expressing  
331 GUS driven by the *B1L* promoter (*B1L::GUS*), B1L-3×Flag driven by the *B1L*  
332 promoter (*B1L::B1L-3×Flag/b1l*) and YFP-B1L driven by the CaMV35S  
333 promoter (*B1L-OX*) were previously described(Chen et al., 2019).

334 Transgenic Arabidopsis plants expressing GUS driven by the *DR5*

335 promoter (*DR5::GUS*), PIN1-GFP driven by the *PIN1* promoter  
336 (*PIN1::PIN1-GFP*), PIN2-GFP driven by the *PIN2* promoter (*PIN2::PIN2-GFP*),  
337 PIN3-GFP driven by the *PIN3* promoter (*PIN3::PIN3-GFP*), AUX1-YFP driven  
338 by the *AUX1* promoter (*AUX1::AUX1-YFP*), SEC12-YFP driven by the *SEC12*  
339 promoter (*SEC12::SEC12-YFP*) and SYP32-YFP driven by the *SYP32*  
340 promoter (*SYP32::SYP32-YFP*) were kindly provided by the Guang-Qin Guo  
341 laboratory and the Quan-Sheng Qiu laboratory of Lanzhou University,  
342 respectively. The above plants were crossed by *b1l-1* mutant and generated  
343 *DR5::GUS/ b1l-1*, *PIN1::PIN1-GFP/b1l-1*, *PIN2::PIN2-GFP/b1l-1*,  
344 *PIN3::PIN3-GFP/b1l-1*, *AUX1::AUX1-YF/ b1l-1*, *SEC12::SEC12-YF/ b1l-1*,  
345 *SYP32::SYP32-YFP/ b1l-1*, respectively.

346 All plants were grown on 1/2 Murashige and Skoog (MS) medium plates in  
347 an artificial climate chamber (RXZ-500; Ningbo Jiangnan, China) with 16 h  
348 light and 8 h dark at 22°C.

#### 349 **Chemical treatment assays**

350 The seedlings grown 3 days after germination on MS medium plates were  
351 transferred on the 1/2 MS medium plates contained different concentrations of  
352 medicines. The phenotypes were analyzed and photographed after 7 days.  
353 The medicines included the auxin Indole-3-acetic acid (IAA, 0.05 and 0.1 µM),  
354 the auxin synthesis inhibitor 2,3,5-triodobenzoic acid (TIBA, 0.5 and 1 µM),  
355 auxin influx inhibitor 2-naphthoxyacetic acid (2-NOA, 0.02 and 0.05 µM) and  
356 auxin efflux inhibitor N-Naphthylphtalamic acid (NPA, 0.1 and 0.5 µM)

#### 357 **Lateral root primordia analysis**

358 The observation of lateral root primordia was performed as previously  
359 described(Xun et al., 2020). The roots of 10 days old seedlings were dipped  
360 with 0.4 M HCl in 20% methanol for 15min at 57°C, then transferred into 7%  
361 NaOH and 7% hydroxylamine-HCl in 60% ethanol for 15min at room  
362 temperature. The roots were washed 5 min with 40%, 20% and 10% ethanol,  
363 respectively, and then dipped in 5% ethanol and 25% glycerol solution for  
364 15min. At last, the roots were stored in 50% glycerol solution. The roots and  
365 lateral root primordia were analyzed and photographed by a research grade  
366 automatic positive fluorescence microscope (Axio Imager.Z2; Zeiss,  
367 Germany).

#### 368 **GUS staining**

369 The GUS staining was performed as previously described(Xun et al., 2020). 10  
370 days old seedlings of *B1L::GUS*, *DR5::GUS* and *DR5::GUS/ b1l-1* were  
371 incubated in GUS staining solution at 37°C for 6 h, then the whole plants were  
372 rinsed with different concentrations of alcohol, and the lateral root primordia  
373 were cleared with hydroxylamine-HCl as described above. A Stereo  
374 Fluorescence Microscope (Discover.v20; Zeiss, Germany) was used to  
375 analyze and photograph for whole plants. The roots and lateral root primordia  
376 were analyzed and photographed by a research grade automatic positive  
377 fluorescence microscope (Axio Imager.Z2; Zeiss, Germany).

---

378 **Image analysis with LSCM**

379 For protein localization of PIN1-GFP, PIN3-GFP and AUX1-YFP experiments,  
380 the roots of 10 days old seedlings were stained with 10g·ml<sup>-1</sup> propidium iodide  
381 (PI) for 6 min. A laser-scanning confocal microscopy (LSCM) (LSM880; Zeiss,  
382 Germany) was used to analyze and photograph. GFP or YFP was excited with  
383 the 488nm laser, and PI was excited with the 561nm laser. The emission of  
384 GFP or YFP and PI was detected between 500-530 nm and 570–670 nm by a  
385 multichannel detector with filters, respectively.

386 For protein localization of SEC12-YFP and SYP32-YFP experiments, the roots  
387 of 10 days old seedlings were directly analyzed and photographed by LSCM  
388 (LSM880; Zeiss, Germany) at a single channel detector.

389 **Total RNA extract and qRT-PCR assay**

390 The roots of 7 days old seedlings were collected to extract total RNA using  
391 RNA prep pure plant kit (TIANGEN). The first strand cDNA was synthesized  
392 from 1 µg of total RNA using the Hifair® III 1st Strand cDNA Synthesis  
393 SuperMix kit (YEASEN, 11141ES10) according to the manufacturer's  
394 instructions.

395 For qRT-PCR, it was performed by ABI Real-Time PCR Detection System (ABI,  
396 Q5) using the Hieff® qPCR SYBR Green Master Mix (Low Rox Plus) (YEASEN,  
397 11202ES08). Three biological replicates and four technical replicates were  
398 performed for each sample. *AtUBC21* (At5g25760) was used as the reference  
399 control(Cai et al., 2017). The primer sequences used for qRT-PCR are listed in  
400 Supplemental Table S3.

401 **Yeast two-hybrid assay**

402 Yeast two-hybrid assays were performed as previously described(Chen et al.,  
403 2019). The CDS of B1L was cloned into the pGBKT7-GW and the CDSs of  
404 exocyst subunits were cloned into the pGADT7-GW vector using gateway  
405 cloning system, respectively. The primer sequences are listed in  
406 Supplementary Table S4. The B1L-pGBKT7 vector and pGADT7 fused  
407 exocyst subunit vector were co-transformed into AH109 strain. The  
408 interactions between B1L and exocyst subunits were determined by observing  
409 the growth status of positive clones on media lacking leucine (Leu), tryptophan  
410 (Trp), histidine (His), and adenine (Ade).

411 **BiFC assay**

412 Bimolecular fluorescence complementation (BiFC) assay was performed as  
413 previously described(Chen et al., 2019). The CDSs of B1L and EXO70B1 were  
414 cloned into the PNYFP-X and PCCFP-X vectors using gateway cloning system,  
415 respectively. The primer sequences are listed in Supplementary Table S4.  
416 Transient co-expressed the fusion genes *YFP<sup>N</sup>-B1L* and *YFP<sup>C</sup>-EXO70B1* in *N.*  
417 *benthamiana* leaves. The interaction was analyzed and photographed by  
418 LSCM (Leica; SP8, Germany)

419 **IP/ Co-IP assay**

420 The IP assay was performed as previously described(Chen et al., 2019). In  
421 brief, total protein was extracted from roots of 7 days old WT and

422 *B1L::B1L-3xFlag* seedlings using IP buffer (50mM Tris-HCl, pH 7.6, 150mM  
423 NaCl, 10% Glycerol, 0.1% NP-40 and 1×Cocktail). Protein extracts were  
424 added into 50µl agarose beads conjugated anti-Flag antibody (M20018L;  
425 Abmart, China), and the mix was incubated with gentle shaking for 6 h at 4 °C.  
426 The beads were washed with IP buffer five times, then added 50µl 1×loading  
427 buffer to boil 10 minutes in water. The beads were centrifuged 1 min at  
428 12000rpm and the supernatant was used for running SDS-PAGE.

429 For Co-IP assay, the CDSs of B1L and EXO70B1 were cloned into the  
430 35S-GATWAY-3×Flag vector and the 35S-GATWAY-3×Myc vector using  
431 gateway cloning system, respectively. The primer sequences are listed in  
432 Supplemental Table S4. The *35S::B1L-Flag* and *35S::EXO70B1-Myc*  
433 constructs were transiently co-expressed in *N. benthamiana* leaves.  
434 *35S::Flag* and *35S::EXO70B1-Myc* constructs were transiently co-expressed  
435 as control. Total protein was extracted from leaves using IP buffer, and the IP  
436 was performed as described above. Anti-Flag antibody (M20008M; Abmart,  
437 China) and anti-Myc antibody (ab32072; Abcam, UK) were used to detect  
438 B1L-Flag and EXO70B1-Myc, respectively.

#### 439 **Western blot**

440 Proteins were extracted as described above and separated on SDS-PAGE  
441 (12%), and then transferred to a PVDF membrane (0.22µm; Millipore, America)  
442 at 200 mA for 1.5h in transfer buffer. The PVDF membrane was blocked in 5%  
443 Non-Fat Powdered Milk (A600669; Sangon Biotech, China) 1h at 22°C. After  
444 incubation with primary antibodies and secondary antibodies respectively, the  
445 PVDF membrane was treated with enhanced chemiluminescent reagent (NCM  
446 Biotech, P10200, China) and then imaged using chemiluminescence imaging  
447 analysis system (BG-gdsAUTO 710 MINI; Baygene biotech, China).

#### 448 **LC-MS/MS**

449 LC-MS/MS analysis was performed as previously described which mainly  
450 included alkylation, tryptic digestion, mass spectrometric and database  
451 searching(Wang et al., 2013; Zhang et al., 2020). The gels of protein bands  
452 were cut into cubic pieces and washed with 50% acetonitrile in 25 mM  
453 NH<sub>4</sub>HCO<sub>3</sub> until the Coomassie brilliant blue was disappeared. The gels were  
454 dehydrated by acetonitrile and vacuum dried. Next, the gels were alkylated  
455 with 10mM TCEP and 40mM CAA, and dehydrated by acetonitrile again. The  
456 gels were digested with 0.01mg·ml<sup>-1</sup> trypsin in 100mM NH<sub>4</sub>HCO<sub>3</sub> solution  
457 8-24h at 37°C. The gels were putted into new tubes and extracted with 0.1%  
458 TFA in 50% acetonitrile. The extracts were mixed with digest solution and  
459 vacuum dried. 0.1% FA was added to dissolve polypeptides. The solutions  
460 were centrifuged at 14000rpm for 30min. The supernatants were analyzed by  
461 liquid chromatography electrospray tandem mass spectrometry (Orbitrap  
462 Fusion Lumos Easy 1200 Nano LC, Thermofisher). The results were analyzed  
463 using thermo proteome discoverer 2.1.1.21 software to search *Arabidopsis*  
464 protein database.

## 465 Accession Numbers

466 Sequence data from this article can be found in The Arabidopsis Information  
467 Resource (<http://www.arabidopsis.org/>). Accession number: *B1L*(AT1G18740).

## 468 Supplemental Data

469 The following supplemental materials are available.

470 **Supplemental Figure S1.** The information of *b1l* mutants.

471 **Supplemental Figure S2.** The length of primary roots are no obvious  
472 difference among wild type, *b1l-1*, *b1l-2* and *b1l-4*.

473 **Supplemental Figure S3.** Morphology of lateral root initiation at different  
474 stages in WT, *b1l-2* and *b1l-4* mutants seedling roots.

475 **Supplemental Figure S4.** B1L is not involved in the auxin biosynthesis and  
476 the auxin influx.

477 **Supplemental Figure S5.** The auxin biosynthesis genes and *PINs* were not  
478 increased at the transcriptional levels in *b1l-1* mutant.

479 **Supplemental Figure S6.** The expression of *AUX1::AUX1-YFP* in eight  
480 development stages of lateral root primordia of WT and *b1l-1* mutant.

481 **Supplemental Figure S7.** The immunoprecipitation and LC-MS/MS analysis  
482 of proteins that potentially interact with B1L.

483 **Supplemental Table S1.** The primers of vectors construction for  
484 CRISPR/Cas9.

485 **Supplemental Table S2.** The primers for identification of *b1l-1*, *b1l-2* and *b1l-4*  
486 mutants.

487 **Supplemental Table S3.** The primers used for qRT-PCR in this study.

488 **Supplemental Table S4.** The primers of vectors construction for Y2H, BiFC  
489 and Co-IP assays.

## 490 Acknowledgements

491 We thank Guang-Qin Guo (Lanzhou University, Lanzhou, Gansu, China) for  
492 providing the *DR5::GUS*, *PIN1::PIN1-GFP*, *PIN3::PIN3-GFP* and  
493 *AUX1::AUX1-YFP* transgenic plants, Quan-Sheng Qiu (Lanzhou University,  
494 Lanzhou, Gansu, China) for providing the *SEC12::SEC12-YFP*  
495 *SYP32::SYP32-YFP* transgenic plants, Qi-Jun Chen (China Agricultural  
496 University, Beijing, China) for providing the CRISPR/Cas9 system vectors, and  
497 the Core Facility for Life Science Research (Lanzhou University) for technical  
498 assistance.

## 499 Figure Legends

500 **Figure1.** The expression pattern of B1L in *Arabidopsis* seedlings. A, Western  
501 blot analysis of B1L in seedling, leaf and root of 10 days old  
502 *B1L::B1L-3xFlag/b1l* seedlings. B1L-3xFlag was recognized by the anti-Flag  
503 and Actin was used as an internal control. B, Quantitative analysis of the  
504 B1L-3xFlag expression shown in A, with Image J software. Intensity of leaf  
505 was set as 1, the values are means  $\pm$  SD (n=3, one-way ANOVA, \*, P < 0.05).



506 C-M, GUS staining analysis of *B1l* expression in whole plant, primary root and  
507 eight different stages of lateral root primordium at 7 day after germination. I-VIII  
508 are eight development stages of lateral root primordia. Images were obtained  
509 by differential interference contrast microscope (DICM), bar in C is 5mm, and  
510 bars in D-M are 50 $\mu$ m.

511 **Figure 2.** B1L regulates the lateral root initiation. A, Root phenotypes of  
512 wild-type (WT), *b1l-1*, *b1l-2*, *b1l-4*, *B1L::B1L-3xFlag/b1l#1*,  
513 *B1L::B1L-3xFlag/b1l#2*, *B1L-OX#1* and *B1L-OX#2*. WT is Col-0.10 days old  
514 seedlings were used for photographs and measurements. Bars is 1.5cm. B,  
515 The number of lateral roots in Figure 2A, seedlings. The values are means  $\pm$   
516 SD (n=44, one-way ANOVA, \*\*, P < 0.01, \*\*\*, P < 0.001). C and D, The  
517 distribution of lateral root primordia at I-VIII stages of WT, *b1l-2* and *b1l-4*  
518 seedlings at 3 days and 6 days, respectively. The values are means  $\pm$  SD (n=3,  
519 two-way ANOVA, \*\*\*, P < 0.001 compared with WT at each sates). E, The  
520 number of stage I lateral root primordia in WT, *b1l-2* and *b1l-4* seedlings at 0-7  
521 days. The values are means  $\pm$  SD (n=3, two-way ANOVA, \*\*, P < 0.01, \*\*\*, P <  
522 0.001 compared with WT at each times). F, The lateral root primordia density  
523 of WT, *b1l-2* and *b1l-4* seedlings at 10 days. The values are means  $\pm$  SD (n=10,  
524 one-way ANOVA, \*\*, P < 0.01 compared with WT).

525 **Figure 3.** The auxin levels are increased in primary root and lateral root  
526 primordia of *b1l-1* mutant. The expression of *DR5::GUS* in whole plant A and L,  
527 vascular cylinder B and M, primary root G and R and eight different stages of  
528 lateral root primordium C-K and N-V of WT and *b1l-1* mutant, respectively. 10  
529 days old seedlings were used for GUS staining. I-VIII are eight development  
530 stages of lateral root primordia. Images were obtained by DICM, bars in A, L  
531 are 5mm, and bars in B-V are 50 $\mu$ m.

532 **Figure 4.** B1L regulates the auxin level by affecting the auxin efflux. A and B,  
533 Phenotypic analysis of lateral root in WT and *b1l-1* seedlings treated with IAA.  
534 The values are means  $\pm$  SD (n $\geq$ 58, Student's *t*-test, \*\*\*, P < 0.001 compared  
535 with WT). C and D, Phenotypic analysis of lateral root in WT and *b1l-1*  
536 seedlings treated with NPA. Bar is 1.5 cm. The values are means  $\pm$  SD (n $\geq$ 83,  
537 Student's *t*-test, \*\*\*, P < 0.001 compared with WT).

538 **Figure 5.** The auxin efflux carrier PIN1-GFP and PIN3-GFP are increased in  
539 lateral root primordia of *b1l-1* mutant. A, The expression of *PIN1::PIN1-GFP* in  
540 eight development stages of lateral root primordia of WT and *b1l-1* mutant. B,  
541 The expression of *PIN3::PIN3-GFP* in eight development stages of lateral root  
542 primordia of WT and *b1l-1* mutant. I-VIII are eight development stages of  
543 lateral root primordia. Images were obtained by confocal microscope, bar is  
544 50 $\mu$ m.

545 **Figure 6.** B1L interacts with exocyst complex. A, 11 exocyst subunits were  
546 identified by LC-MS/MS in eluants immunoprecipitated by anti-Flag agarose  
547 beads. UPs are unique peptides. B, The interactions among B1L and exocyst  
548 subunits were verified by yeast two-hybrid (YH2) assays. The empty pGADT7  
549 and pGBKT7 vectors were used as negative controls. C, BiFC analysis of the



550 interaction between B1L and EXO70B1 in *N. benthamiana*. Bars are 50 $\mu$ m. D,  
551 Co-IP confirm the interaction between B1L and EXO70B1. 35s::*EXO70B1-Myc*  
552 were co-transfected with 35s::*B1L-Flag* or *Flag* empty vector in *N.*  
553 *benthamiana* leaves. Total proteins were immunoprecipitated with anti-Flag  
554 agarose beads. B1L-Flag was detected with anti-Flag antibody and  
555 immunoprecipitated EXO70B1-Myc was detected with anti- Myc antibody.

556 **Figure 7.** B1L is involved in the exocytic vesicle trafficking. A and C The  
557 locations of SEC12-YFP and SYP32-YFP in primary roots of WT and *b1l-1*  
558 mutant, respectively. Images were obtained by confocal microscope, bar is  
559 20 $\mu$ m. B and D, Line scan measurement (White arrows) of the fluorescence  
560 intensity in one cell with Image J software. E, *b1l-1* mutants showed defect in  
561 PIN2-GFP exocytosis. *PIN2-GFP* and *PIN2-GFP/b1l-1* seedlings were treated  
562 with 50mM CHX for 60min and then were treated with 50mM BFA for 2h. The  
563 BFA washout with 0.5 $\times$ M and imaged at 0, 30, 60, and 90min by confocal  
564 microscope. White arrowheads are PIN2-GFP-labeled BFA bodies. Bar is  
565 20 $\mu$ m. F, the number of PIN2-GFP-labeled BFA bodies per cell after BFA  
566 washout at indicate times. The values are means  $\pm$  SEM (n $\geq$ 29, *two-way*  
567 *ANOVA*, \*\*\*, P < 0.001 compared with WT at each times).

568 **Figure 8.** B1L genetically interacts with EXO70B1 in regulating the lateral roots  
569 development. A, Lateral root phenotypes of WT, *b1l-1*, *exo70b1-1* and  
570 *b1l-1/exo70b1-1*. Bar is 1.5 cm. B, The number of lateral roots in Fig.8A. The  
571 values are means  $\pm$  SD (n $\geq$ 60, *one-way ANOVA*, \*\*\*, P < 0.001 compared with  
572 WT or single mutants).

573

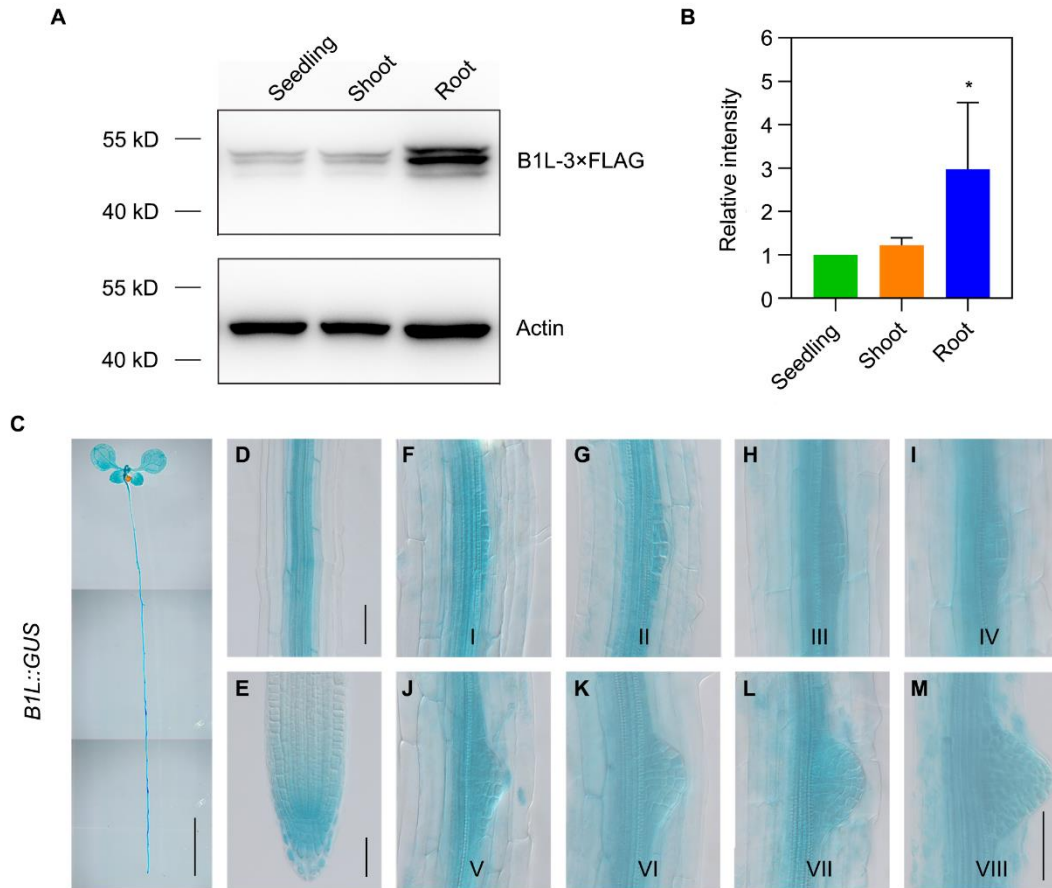

**Figure1.** The expression pattern of B1L in *Arabidopsis* seedlings. A, Western blot analysis of B1L in seedling, leaf and root of 10 days old *B1L::B1L-3xFlag/b1l* seedlings. B1L-3xFlag was recognized by the anti-Flag and Actin was used as an internal control. B, Quantitative analysis of the B1L-3xFlag expression shown in A, with Image J software. Intensity of leaf was set as 1, the values are means  $\pm$  SD (n=3, one-way ANOVA, \*, P < 0.05). C-M, GUS staining analysis of *B1l* expression in whole plant, primary root and eight different stages of lateral root primordium at 7 day after germination. I-VIII are eight development stages of lateral root primordia. Images were obtained by differential interference contrast microscope (DICM), bar in C is 5mm, and bars in D-M are 50 $\mu$ m.

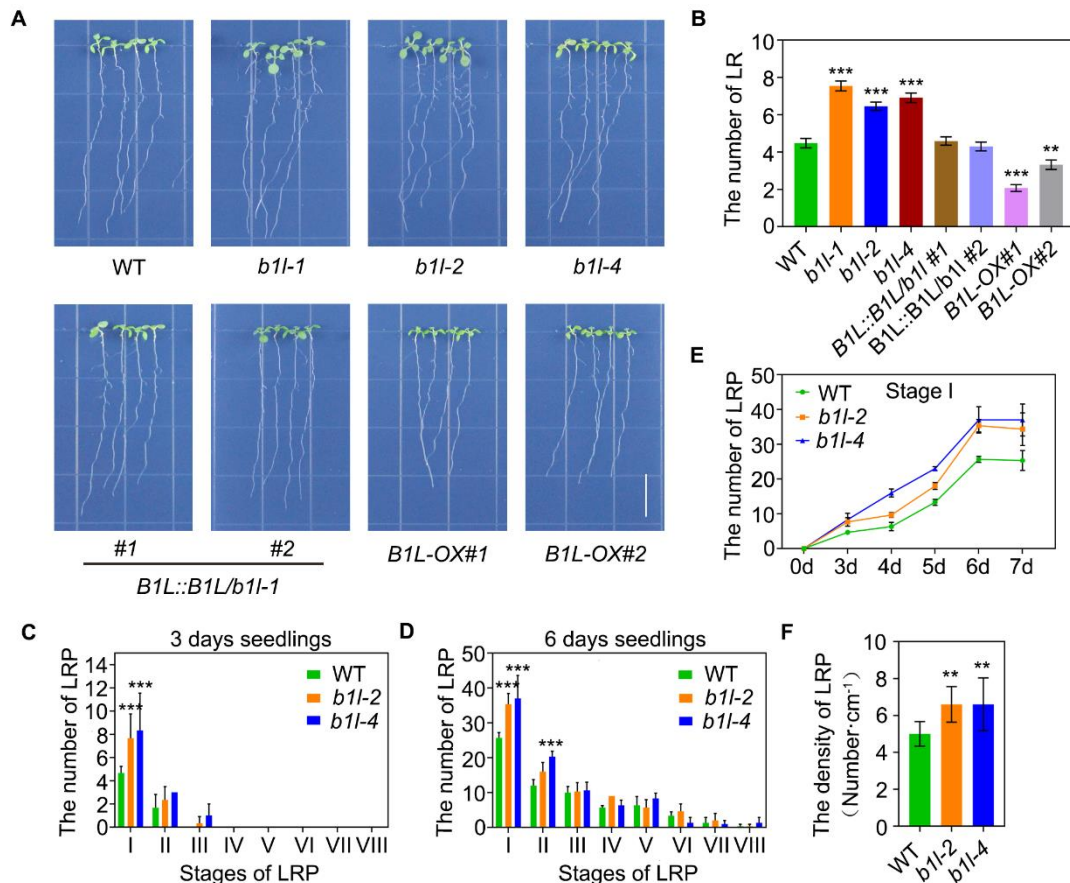

**Figure 2.** B1L regulates the lateral root initiation. A, Root phenotypes of wild-type (WT), *b1l-1*, *b1l-2*, *b1l-4*, *B1L::B1L-3xFlag/b1l#1*, *B1L::B1L-3xFlag/b1l#2*, *B1L-OX#1* and *B1L-OX#2*. WT is Col-0.10 days old seedlings were used for photographs and measurements. Bars is 1.5cm. B, The number of lateral roots in Figure 2A, seedlings. The values are means  $\pm$  SD (n=44, one-way ANOVA, \*\*, P < 0.01, \*\*\*, P < 0.001). C and D, The distribution of lateral root primordia at I-VIII stages of WT, *b1l-2* and *b1l-4* seedlings at 3 days and 6 days, respectively. The values are means  $\pm$  SD (n=3, two-way ANOVA, \*\*\*, P < 0.001 compared with WT at each sates). E, The number of stage I lateral root primordia in WT, *b1l-2* and *b1l-4* seedlings at 0-7 days. The values are means  $\pm$  SD (n=3, two-way ANOVA, \*\*, P < 0.01, \*\*\*, P < 0.001 compared with WT at each times). F, The lateral root primordia density of WT, *b1l-2* and *b1l-4* seedlings at 10 days. The values are means  $\pm$  SD (n=10, one-way ANOVA, \*\*, P < 0.01 compared with WT).

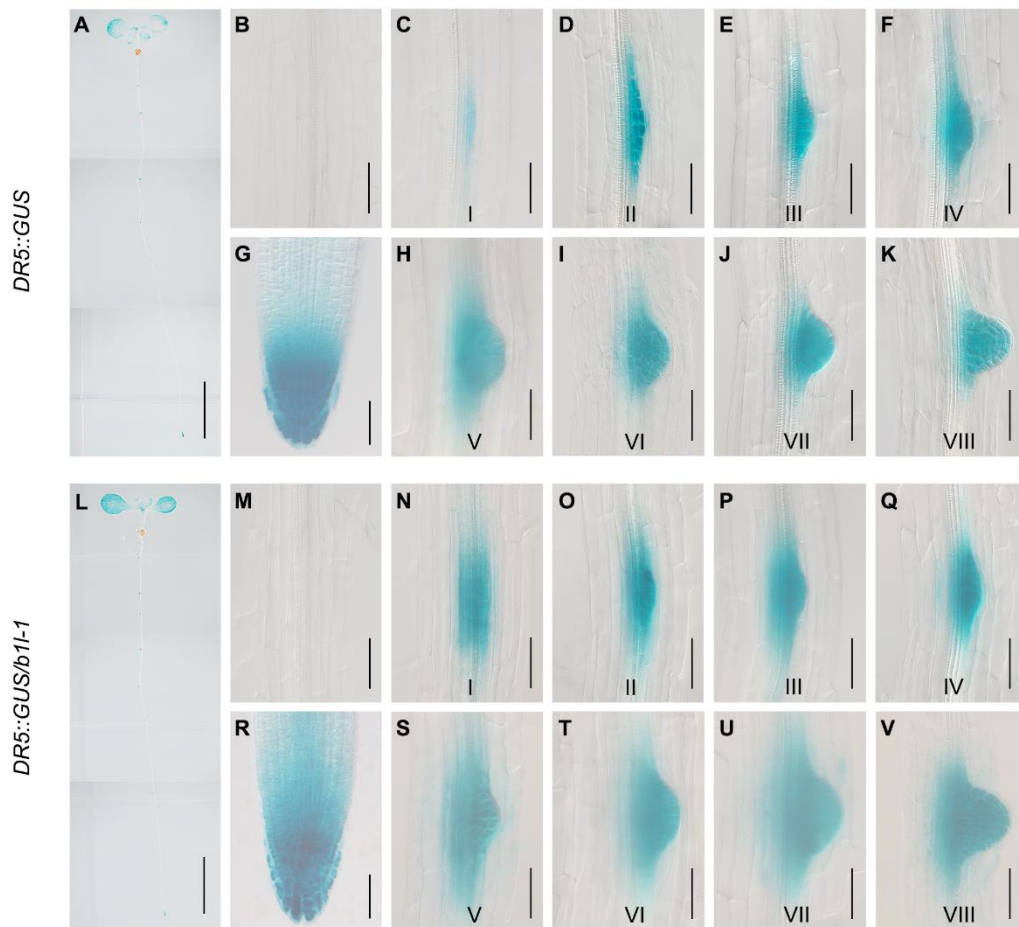

**Figure 3.** The auxin levels are increased in primary root and lateral root primordia of *b1l-1* mutant. The expression of *DR5::GUS* in whole plant A and L, vascular cylinder B and M, primary root G and R and eight different stages of lateral root primordium C-K and N-V of WT and *b1l-1* mutant, respectively. 10 days old seedlings were used for GUS staining. I-VIII are eight development stages of lateral root primordia. Images were obtained by DICM, bars in A, L are 5mm, and bars in B-V are 50µm.

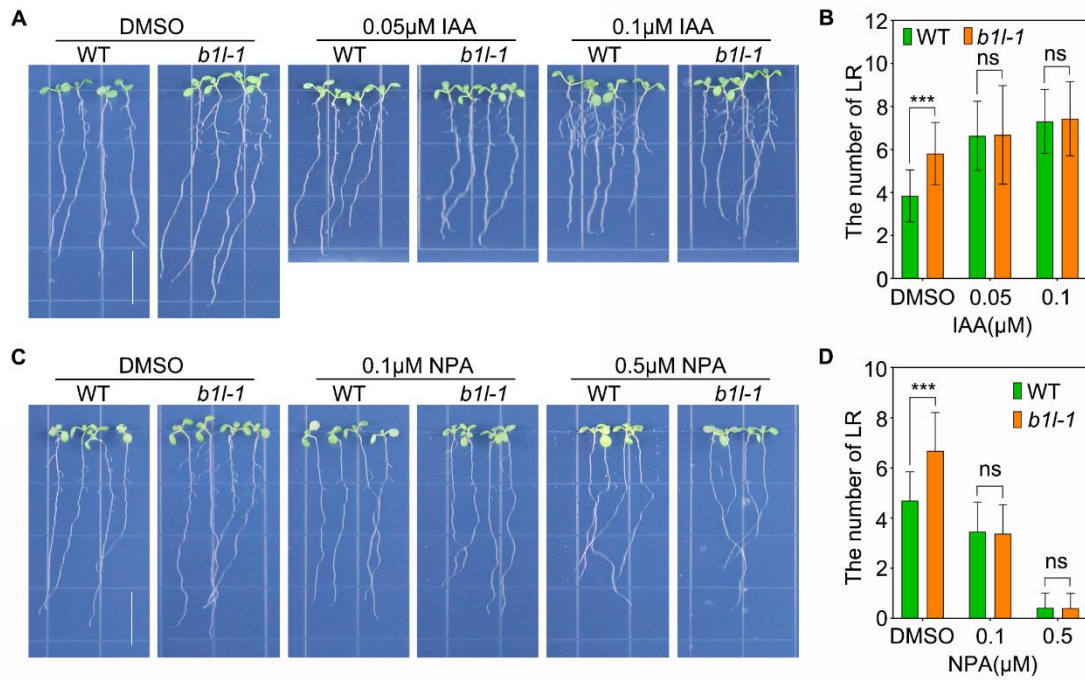

**Figure 4.** B1L regulates the auxin level by affecting the auxin efflux. A and B, Phenotypic analysis of lateral root in WT and *b1l-1* seedlings treated with IAA. The values are means  $\pm$  SD ( $n \geq 58$ , Student's *t*-test, \*\*\*,  $P < 0.001$  compared with WT). C and D, Phenotypic analysis of lateral root in WT and *b1l-1* seedlings treated with NPA. Bar is 1.5 cm. The values are means  $\pm$  SD ( $n \geq 83$ , Student's *t*-test, \*\*\*,  $P < 0.001$  compared with WT).



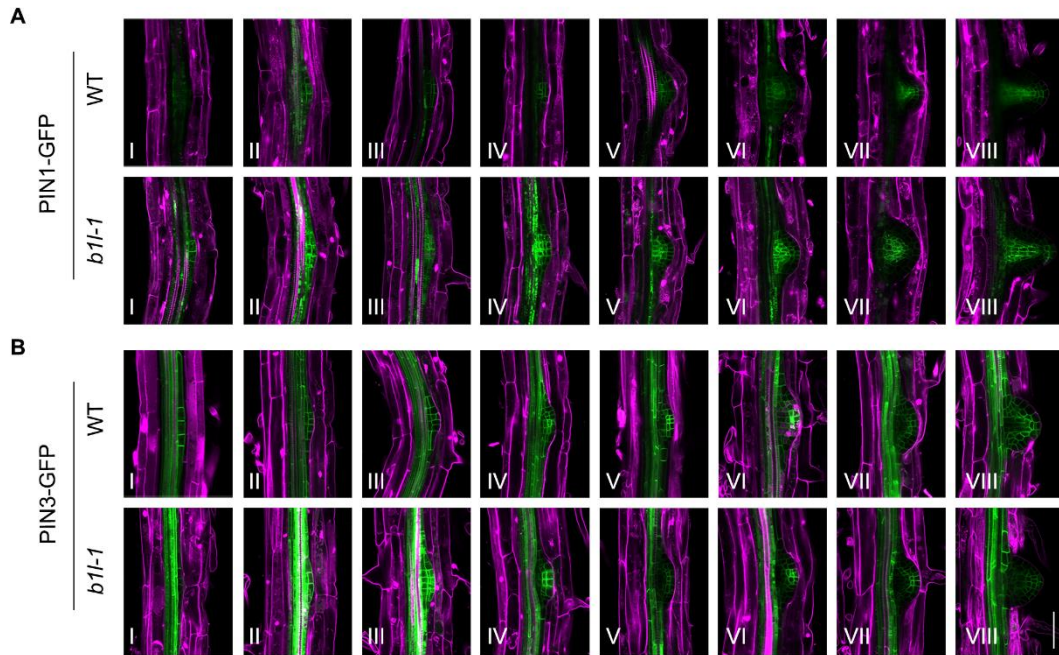

**Figure 5.** The auxin efflux carrier PIN1-GFP and PIN3-GFP are increased in lateral root primordia of *b1l-1* mutant. A, The expression of *PIN1::PIN1-GFP* in eight development stages of lateral root primordia of WT and *b1l-1* mutant. B, The expression of *PIN3::PIN3-GFP* in eight development stages of lateral root primordia of WT and *b1l-1* mutant. I-VIII are eight development stages of lateral root primordia. Images were obtained by confocal microscope, bar is 50μm.



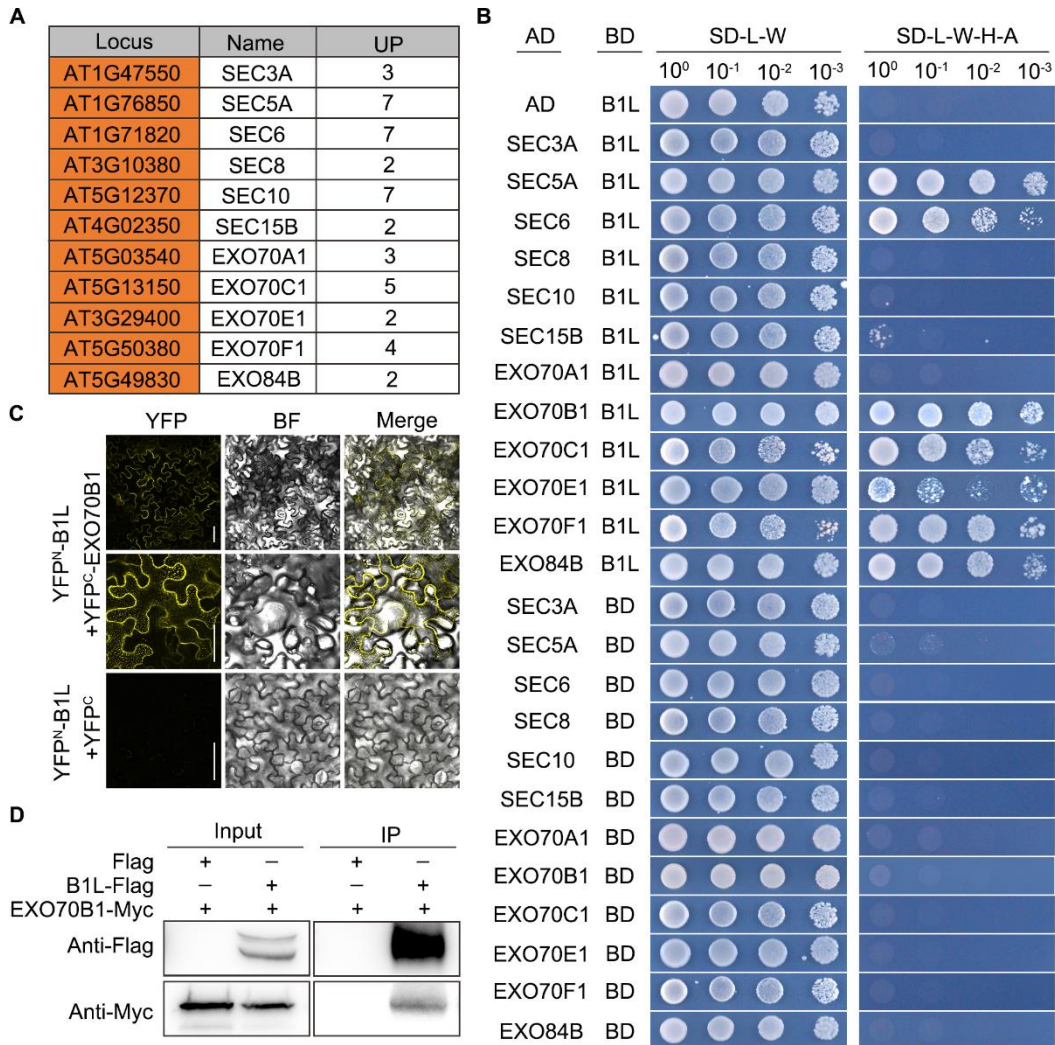

**Figure 6.** B1L interacts with exocyst complex. A, 11 exocyst subunits were identified by LC-MS/MS in eluants immunoprecipitated by anti-Flag agarose beads. UPs are unique peptides. B, The interactions among B1L and exocyst subunits were verified by yeast two-hybrid (YH2) assays. The empty pGADT7 and pGBKT7 vectors were used as negative controls. C, BiFC analysis of the interaction between B1L and EXO70B1 in *N. benthamiana*. Bars are 50µm. D, Co-IP confirm the interaction between B1L and EXO70B1. 35s::EXO70B1-Myc were co-transfected with 35s::B1L-Flag or Flag empty vector in *N. benthamiana* leaves. Total proteins were immunoprecipitated with anti-Flag agarose beads. B1L-Flag was detected with anti-Flag antibody and immunoprecipitated EXO70B1-Myc was detected with anti-Myc antibody.

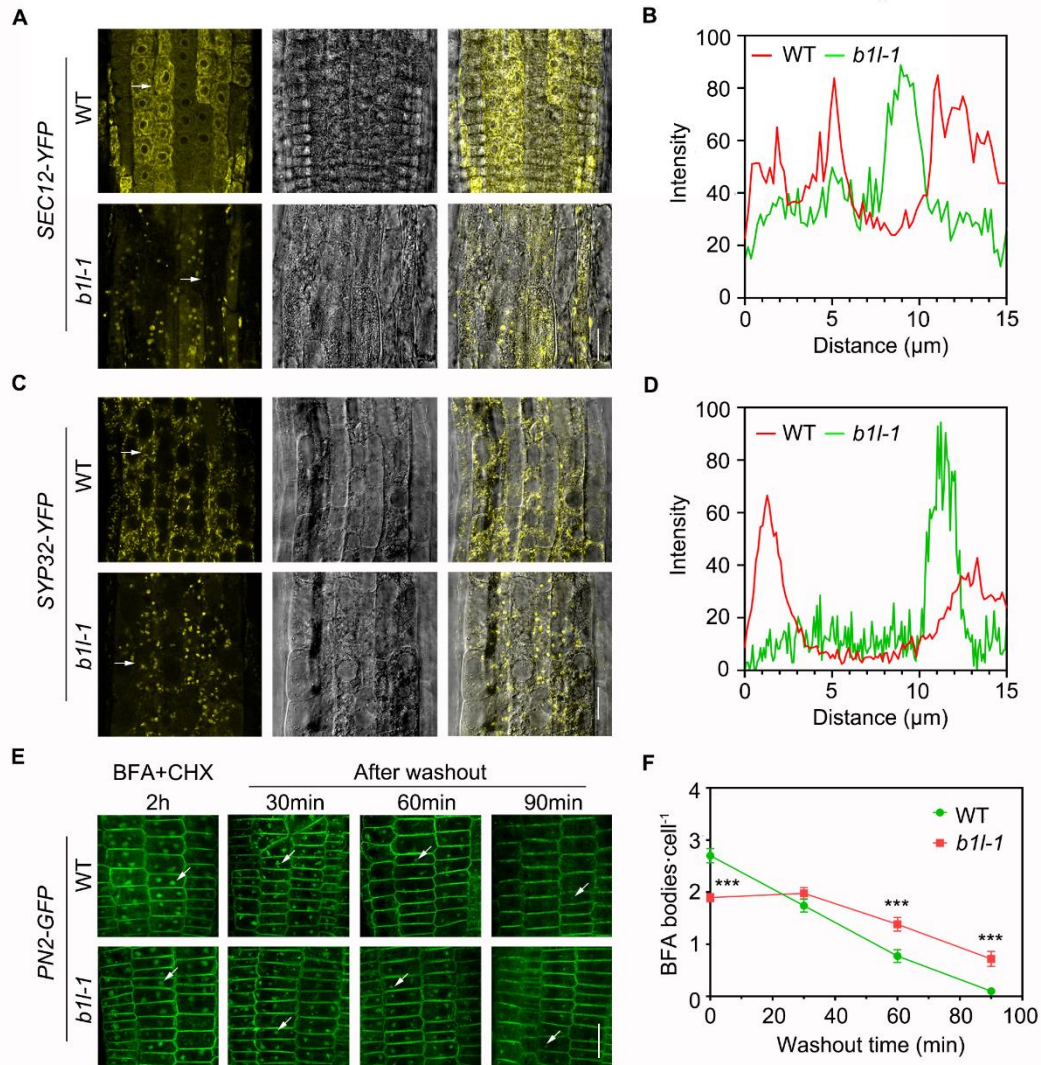

**Figure 7.** B1L is involved in the exocytic vesicle trafficking. A and C The locations of SEC12-YFP and SYP32-YFP in primary roots of WT and *b1l-1* mutant, respectively. Images were obtained by confocal microscope, bar is 20 $\mu\text{m}$ . B and D, Line scan measurement (White arrows) of the fluorescence intensity in one cell with Image J software. E, *b1l-1* mutants showed defect in PIN2-GFP exocytosis. *PIN2-GFP* and *PIN2-GFP/b1l-1* seedlings were treated with 50mM CHX for 60min and then were treated with 50mM BFA for 2h. The BFA washout with 0.5 $\times$ M and imaged at 0, 30, 60, and 90min by confocal microscope. White arrowheads are PIN2-GFP-labeled BFA bodies. Bar is 20 $\mu\text{m}$ . F, The number of PIN2-GFP-labeled BFA bodies per cell after BFA washout at indicate times. The values are means  $\pm$  SEM ( $n \geq 29$ , two-way ANOVA, \*\*\*,  $P < 0.001$  compared with WT at each times).

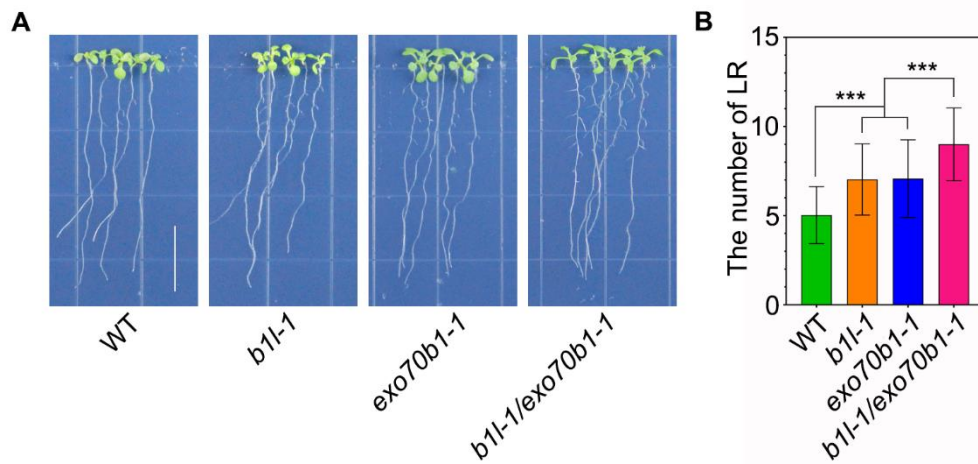

**Figure 8.** B1L genetically interacts with EXO70B1 in regulating the lateral roots development. A, Lateral root phenotypes of WT, *b1l-1*, *exo70b1-1* and *b1l-1/exo70b1-1*. Bar is 1.5 cm. B, The number of lateral roots in Fig.8A. The values are means  $\pm$  SD ( $n \geq 60$ , one-way ANOVA, \*\*\*,  $P < 0.001$  compared with WT or single mutants).

## Parsed Citations

- Banda J, Bellande K, von Wangenheim D, Goh T, Guyomarc'h S, Laplace L, Bennett MJ (2019) Lateral Root Formation in Arabidopsis: A Well-Ordered L-Rexit. Trends Plant Sci 24: 826–839**  
Google Scholar: [Author Only](#) [Title Only](#) [Author and Title](#)
- Bellini C, Pacurar DI, Perrone I (2014) Adventitious roots and lateral roots: Similarities and differences. Annu Rev Plant Biol 65: 639–666**  
Google Scholar: [Author Only](#) [Title Only](#) [Author and Title](#)
- Benková E, Michniewicz M, Sauer M, Teichmann T, Seifertová D, Jürgens G, Friml J (2003) Local, Efflux-Dependent Auxin Gradients as a Common Module for Plant Organ Formation. Cell 115: 591–602**  
Google Scholar: [Author Only](#) [Title Only](#) [Author and Title](#)
- Cai YM, Yu J, Ge Y, Mironov A, Gallois P (2017) Two proteases with caspase-3-like activity, cathepsin B and proteasome, antagonistically control ER-stress-induced programmed cell death in Arabidopsis. New Phytol 218: 1143–1155**  
Google Scholar: [Author Only](#) [Title Only](#) [Author and Title](#)
- Chen T, Chen JH, Zhang W, Yang G, Yu LJ, Li DM, Li B, Sheng HM, Zhang H, An LZ (2019) BYPASS1-LIKE, a DUF793 family protein, participates in freezing tolerance Via the CBF pathway in Arabidopsis. Front Plant Sci 10: 807**  
Google Scholar: [Author Only](#) [Title Only](#) [Author and Title](#)
- Chen T, Zhang W, Yang G, Chen JH, Chen BX, Sun R, Zhang H, An LZ (2020) TRANSTHYRETIN-LIKE and BYPASS1-LIKE co-regulate growth and cold tolerance in Arabidopsis. BMC Plant Biol 20: 1–11**  
Google Scholar: [Author Only](#) [Title Only](#) [Author and Title](#)
- Drdová EJ, Synek L, Pečenková T, Hála M, Kulich I, Fowler JE, Murphy AS, Žárský V (2013) The exocyst complex contributes to PIN auxin efflux carrier recycling and polar auxin transport in Arabidopsis. Plant J 73: 709–719**  
Google Scholar: [Author Only](#) [Title Only](#) [Author and Title](#)
- Du Y, Scheres B (2018) Lateral root formation and the multiple roles of auxin. J Exp Bot 69: 155–167**  
Google Scholar: [Author Only](#) [Title Only](#) [Author and Title](#)
- Eckardt NA (2008) An exocyst vesicle tethering complex in plants. Plant Cell 20: 1188**  
Google Scholar: [Author Only](#) [Title Only](#) [Author and Title](#)
- Elias M, Drdova E, Ziak D, Bavlnka B, Hala M, Cvrckova F, Soukupova H, Zarsky V (2003) The exocyst complex in plants. Cell Biol Int 27: 199–201**  
Google Scholar: [Author Only](#) [Title Only](#) [Author and Title](#)
- Fendrych M, Žárský V, Synek L, Pečenková T, Toupalová H, Cole R, Drdová E, Nebesářová J, Sedinová M, Hála M, et al (2010) The Arabidopsis exocyst complex is involved in cytokinesis and cell plate maturation. Plant Cell 22: 3053–3065**  
Google Scholar: [Author Only](#) [Title Only](#) [Author and Title](#)
- Gao X, Nagawa S, Wang G, Yang Z (2008) Cell polarity signaling: Focus on polar auxin transport. Mol Plant 1: 899–909**  
Google Scholar: [Author Only](#) [Title Only](#) [Author and Title](#)
- Lavenus J, Goh T, Roberts I, Guyomarc'h S, Lucas M, De Smet I, Fukaki H, Beeckman T, Bennett M, Laplace L (2013) Lateral root development in Arabidopsis: Fifty shades of auxin. Trends Plant Sci 18: 450–458**  
Google Scholar: [Author Only](#) [Title Only](#) [Author and Title](#)
- Lynch J (1995) Root Architecture and Plant Productivity. Plant Physiol 109: 7–13**  
Google Scholar: [Author Only](#) [Title Only](#) [Author and Title](#)
- Mayers JR, Hu T, Wang C, Cárdenas JJ, Tan Y, Pan J, Bednarek SY (2017) SCD1 and SCD2 form a complex that functions with the exocyst and RabE1 in exocytosis and cytokinesis. Plant Cell 29: 2610–2625**  
Google Scholar: [Author Only](#) [Title Only](#) [Author and Title](#)
- Mei K, Guo W (2018) The exocyst complex. Curr Biol 28: R922–R925**  
Google Scholar: [Author Only](#) [Title Only](#) [Author and Title](#)
- Möller BK, Xuan W, Beeckman T (2017) Dynamic control of lateral root positioning. Curr Opin Plant Biol 35: 1–7**  
Google Scholar: [Author Only](#) [Title Only](#) [Author and Title](#)
- Motte H, Vanneste S, Beeckman T (2019) Molecular and Environmental Regulation of Root Development. Annu Rev Plant Biol 70: 465–488**  
Google Scholar: [Author Only](#) [Title Only](#) [Author and Title](#)
- Naramoto S (2017) Polar transport in plants mediated by membrane transporters: focus on mechanisms of polar auxin transport. Curr Opin Plant Biol 40: 8–14**  
Google Scholar: [Author Only](#) [Title Only](#) [Author and Title](#)
- Pavel Křeček, Petr Skůpa, Jiří Libus, Naramoto S, Ricardo Tejos, Jiří Friml, Eva Zažímalová (2009) The PIN-FORMED (PIN) protein**



**family of auxin transporters. *Genome Biol* 10: 249**

Google Scholar: [Author Only](#) [Title Only](#) [Author and Title](#)

**Péret B, De Rybel B, Casimiro I, Benková E, Swarup R, Laplaze L, Beeckman T, Bennett MJ (2009) Arabidopsis lateral root development: an emerging story. *Trends Plant Sci* 14: 399–408**

Google Scholar: [Author Only](#) [Title Only](#) [Author and Title](#)

**Robatzek S (2007) Vesicle trafficking in plant immune responses. *Cell Microbiol* 9: 1–8**

Google Scholar: [Author Only](#) [Title Only](#) [Author and Title](#)

**Schneider-Poetsch T, Ju J, Eyler DE, Dang Y, Bhat S, Merrick WC, Green R, Shen B, Liu JO (2010) Inhibition of eukaryotic translation elongation by cycloheximide and lactimidomycin. *Nat Chem Biol* 6: 209–217**

Google Scholar: [Author Only](#) [Title Only](#) [Author and Title](#)

**Stoeckle D, Thellmann M, Vermeer JE (2018) Breakout–lateral root emergence in *Arabidopsis thaliana*. *Curr Opin Plant Biol* 41: 67–72**

Google Scholar: [Author Only](#) [Title Only](#) [Author and Title](#)

**Tan X, Feng Y, Liu Y, Bao Y (2016) Mutations in exocyst complex subunit SEC6 gene impaired polar auxin transport and PIN protein recycling in *Arabidopsis* primary root. *Plant Sci* 250: 97–104**

Google Scholar: [Author Only](#) [Title Only](#) [Author and Title](#)

**Tanaka H, Dhonukshe P, Brewer PB, Friml J (2006) Spatiotemporal asymmetric auxin distribution: A means to coordinate plant development. *Cell Mol Life Sci* 63: 2738–2754**

Google Scholar: [Author Only](#) [Title Only](#) [Author and Title](#)

**Uemura T, Ueda T (2014) Plant vacuolar trafficking driven by RAB and SNARE proteins. *Curr Opin Plant Biol* 22: 116–121**

Google Scholar: [Author Only](#) [Title Only](#) [Author and Title](#)

**Vilches-Barro A, Maizel A (2015) Talking through walls: Mechanisms of lateral root emergence in *Arabidopsis thaliana*. *Curr Opin Plant Biol* 23: 31–38**

Google Scholar: [Author Only](#) [Title Only](#) [Author and Title](#)

**Wang C, Shang JX, Chen QX, Osés-Prieto JA, Bai MY, Yang Y, Yuan M, Zhang YL, Mu CC, Deng Z, et al (2013) Identification of bZR1-interacting proteins as potential components of the brassinosteroid signaling pathway in *Arabidopsis* through tandem affinity purification. *Mol Cell Proteomics* 12: 3653–3665**

Google Scholar: [Author Only](#) [Title Only](#) [Author and Title](#)

**Wang ZP, Xing HL, Dong L, Zhang HY, Han CY, Wang XC, Chen QJ (2015) Egg cell-specific promoter-controlled CRISPR/Cas9 efficiently generates homozygous mutants for multiple target genes in *Arabidopsis* in a single generation. *Genome Biol* 16: 1–12**

Google Scholar: [Author Only](#) [Title Only](#) [Author and Title](#)

**Wu B, Guo W (2015) The exocyst at a glance. *J Cell Sci* 128: 2957–2964**

Google Scholar: [Author Only](#) [Title Only](#) [Author and Title](#)

**Wu LG, Hamid E, Shin W, Chiang HC (2014) Exocytosis and endocytosis: Modes, functions, and coupling mechanisms\*. *Annu Rev Physiol* 76: 301–331**

Google Scholar: [Author Only](#) [Title Only](#) [Author and Title](#)

**Xun Q, Wu Y, Li H, Chang J, Ou Y, He K, Gou X, Tax FE, Li J (2020) Two receptor-like protein kinases, MUSTACHES and MUSTACHES-LIKE, regulate lateral root development in *Arabidopsis thaliana*. *New Phytol* 227: 1157–1173**

Google Scholar: [Author Only](#) [Title Only](#) [Author and Title](#)

**Žárský V, Kulich I, Fendrych M, Pečenková T (2013) Exocyst complexes multiple functions in plant cells secretory pathways. *Curr Opin Plant Biol* 16: 726–733**

Google Scholar: [Author Only](#) [Title Only](#) [Author and Title](#)

**Zhang J, Qin Q, Nan X, Guo Z, Liu Y, Jadoon S, Chen Y, Zhao L, Yan L, Hou S (2020) Role of protein phosphatase1 regulatory subunit3 in mediating the abscisic acid response. *Plant Physiol* 184: 1317–1332**

Google Scholar: [Author Only](#) [Title Only](#) [Author and Title](#)

**Zhang L, Xing J, Lin J (2019) At the intersection of exocytosis and endocytosis in plants. *New Phytol* 224: 1479–1489**

Google Scholar: [Author Only](#) [Title Only](#) [Author and Title](#)

**Zhou JJ, Luo J (2018) The PIN-FORMED auxin efflux carriers in plants. *Int J Mol Sci* 19: 1–21**

Google Scholar: [Author Only](#) [Title Only](#) [Author and Title](#)
